# Supplementary material
Source: MDPI journal article supplement (https://www.mdpi.com/2073-4344/11/2/267)
Supplement: s1 [file s1]

## Supporting Information

# Regioselective Hydroxylation of Oleanolic Acid Catalyzed by Human CYP3A4 to Produce Hederagenenin, a Chiral Metabolite

Ngoc Tan Cao <sup>1</sup>, Ngoc Anh Nguyen <sup>1</sup>, Thien-Kim Le <sup>1</sup>, Gun Su Cha <sup>2</sup>, Ki Deok Park <sup>3</sup> and Chul-Ho Yun <sup>1,\*</sup>

<sup>1</sup> School of Biological Sciences and Technology, Chonnam National University, 77 Yongbongro, Gwangju 61186, Korea; 187529@jnu.ac.kr (N.T.C.); 188719@jnu.ac.kr (N.A.N.); lethienkim@chonnam.ac.kr (T.-K.L.)

<sup>2</sup> Namhae Garlic Research Institute, 2465-8 Namhaedaero, Gyeongsangnamdo 52430, Korea; gscha450@gmail.com

<sup>3</sup> Gwangju Center, Korea Basic Science Institute, Gwangju 61186, Korea; kdpark@kbsi.re.kr

\* Correspondence: chyun@jnu.ac.kr; Tel. +82-62-530-2194

**Supplementary Table S1.**  $^{13}\text{C}$  NMR chemical shifts of metabolite, M1

| <b>Position</b> | $\delta_{\text{C}}$<br>$^{13}\text{C}(\delta)$ , ppm |
|-----------------|------------------------------------------------------|
| <b>1</b>        | 39.03                                                |
| <b>2</b>        | 28.74                                                |
| <b>3</b>        | 80.46                                                |
| <b>4</b>        | 43.51                                                |
| <b>5</b>        | 56.71                                                |
| <b>6</b>        | 19.44                                                |
| <b>7</b>        | 33.90                                                |
| <b>8</b>        | 40.08                                                |
| <b>9</b>        | 48.51                                                |
| <b>10</b>       | 37.47                                                |
| <b>11</b>       | 24.40                                                |
| <b>12</b>       | 122.81                                               |
| <b>13</b>       | 145.16                                               |
| <b>14</b>       | 42.46                                                |
| <b>15</b>       | 28.64                                                |
| <b>16</b>       | 24.03                                                |
| <b>17</b>       | 47.01                                                |
| <b>18</b>       | 42.34                                                |
| <b>19</b>       | 46.82                                                |
| <b>20</b>       | 30.34                                                |
| <b>21</b>       | 34.55                                                |
| <b>22</b>       | 33.53                                                |
| <b>23</b>       | 64.91                                                |
| <b>24</b>       | 23.95                                                |
| <b>25</b>       | 16.32                                                |
| <b>26</b>       | 17.62                                                |
| <b>27</b>       | 26.47                                                |
| <b>28</b>       | 180.54                                               |
| <b>29</b>       | 24.10                                                |
| <b>30</b>       | 33.61                                                |

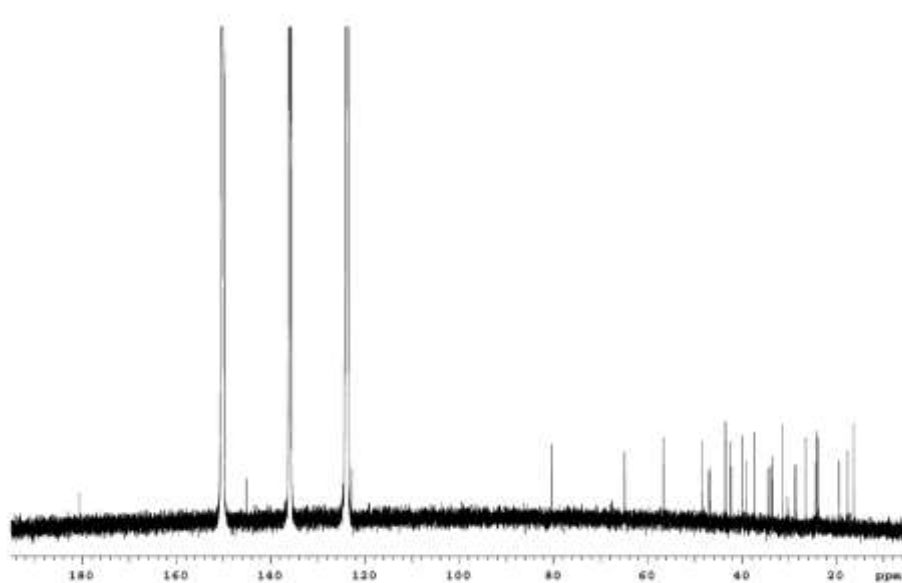

**Supplementary Figure S1.**  $^{13}\text{C}$  NMR spectra of metabolite, M1.

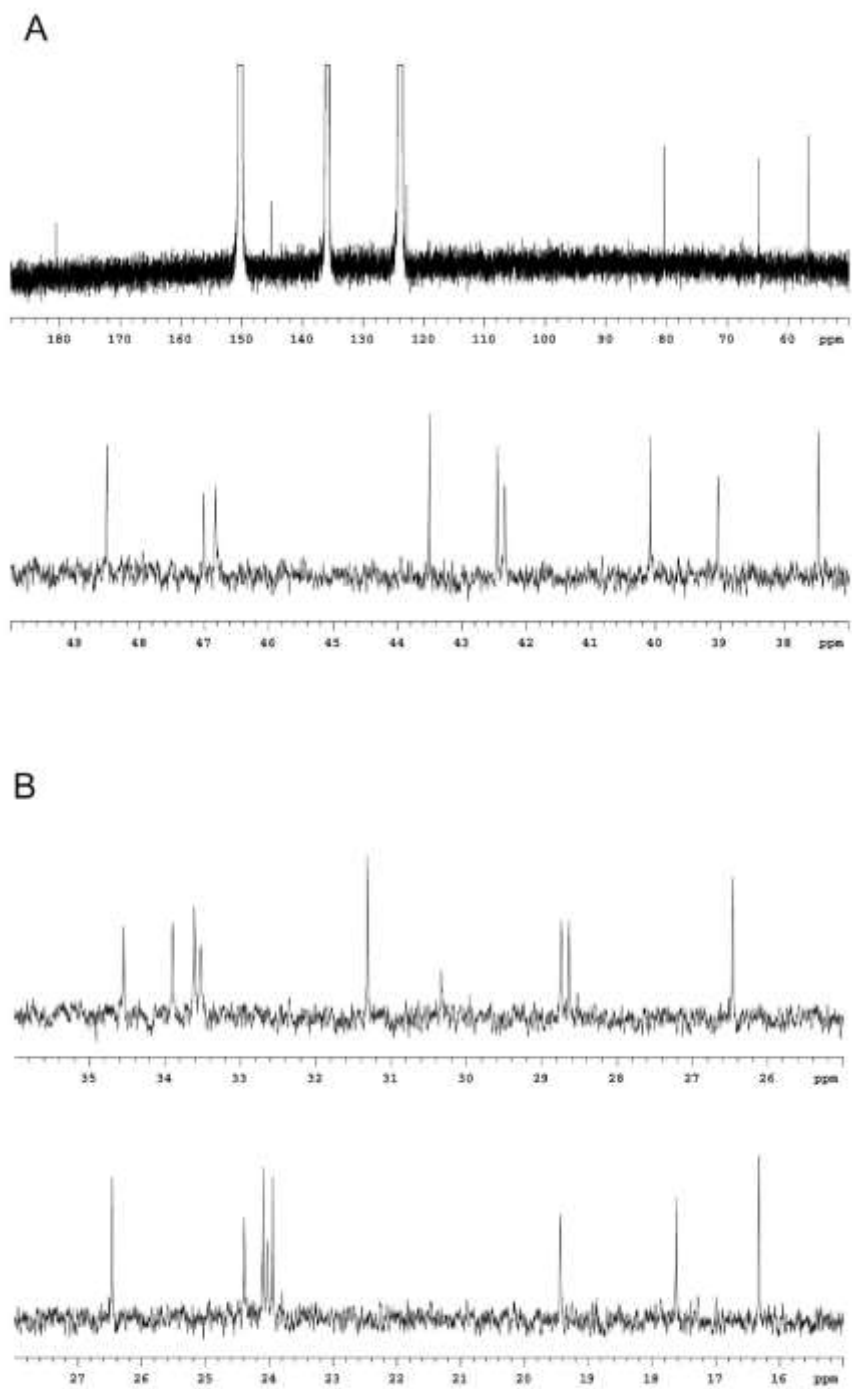

**Supplementary Figure S2.** Expanded regions of  $^{13}\text{C}$  NMR spectra of metabolite, M1. (A) 37-190 ppm. (B) 15-37 ppm.

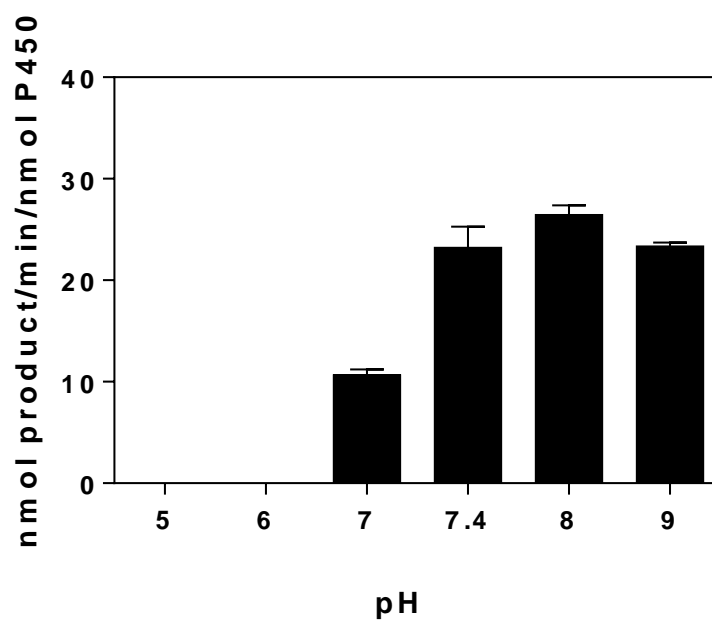

**Supplementary Figure S3.** pH-dependence of 4-epi-hederagenin formation by CYP3A4. Values represent the mean  $\pm$  SD of the three determinations.

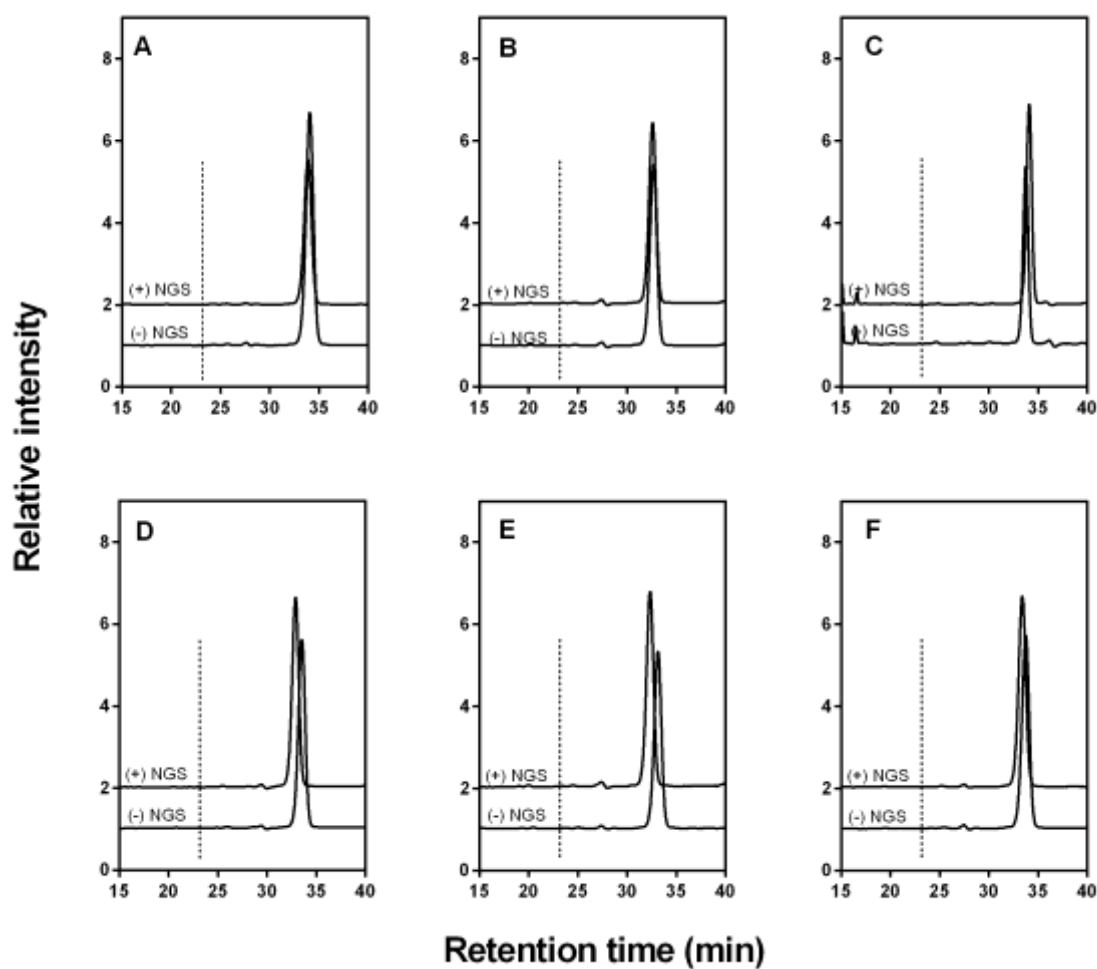

**Supplementary Figure S4.** HPLC chromatograms of OA and its metabolite produced by human P450s with (+NGS) and without NADPH (-NGS). The reaction mixture containing 0.20  $\mu$ M P450 and 100  $\mu$ M OA was incubated at 37  $^{\circ}$ C for 60 min. Retention times: 4-epi-hederagenin (M1),  $t_R$  = 22.4 min; OA,  $t_R$  = 32.3 min. (A) CYP2E1, (B) CYP2D6, (C) CYP2C19, (D) CYP1B1, (E) CYP2C9, and (F) CYP1A2. The position of 4-epi-hederagenin is indicated with a vertical dot line.

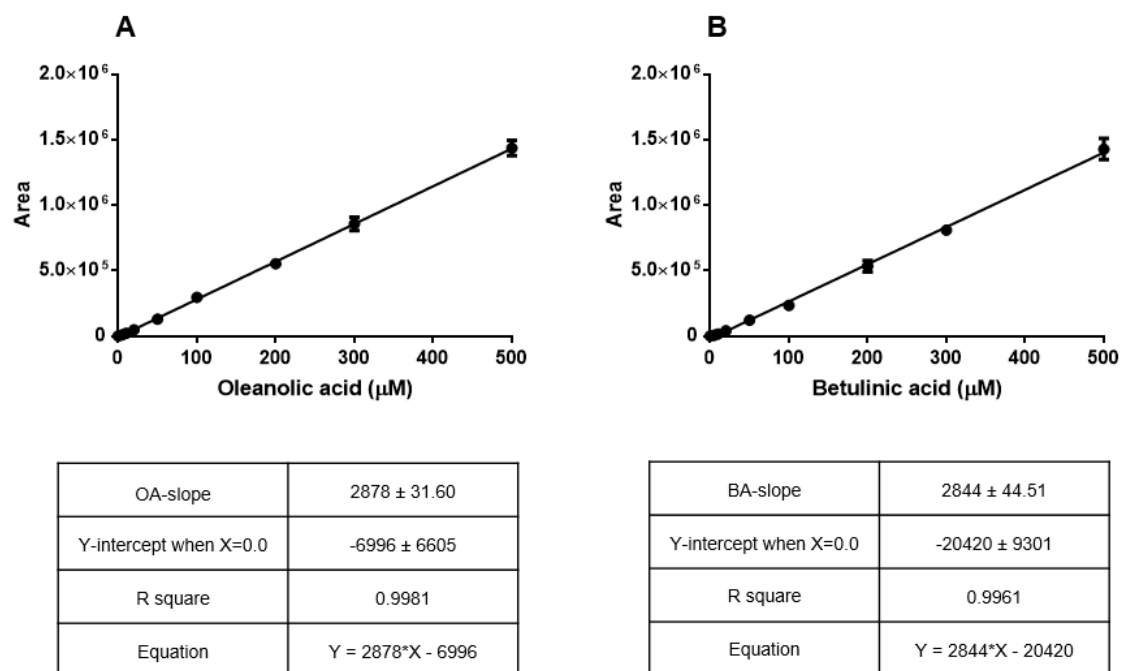

**Supplementary Figure S5.** Standard curves of internal standard (BA), and OA. Different concentration of OA and BA were used at 0.2, 0.5, 1, 2, 5, 10, 20, 30, 50, 100, 200, 300, and 500  $\mu\text{M}$ .

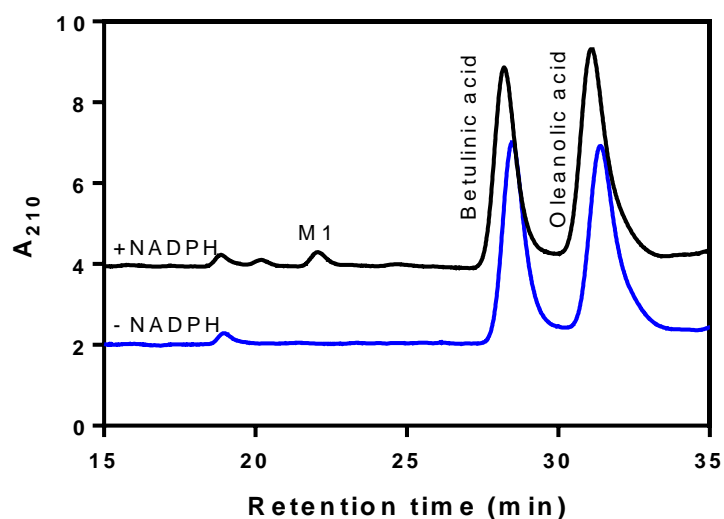

**Supplementary Figure S6.** HPLC chromatograms of OA and its metabolite produced by CYP3A4 with and without NADPH. The reaction mixture containing 0.20  $\mu$ M CYP3A4 enzyme and 100  $\mu$ M OA was incubated at 37  $^{\circ}$ C for 60 min. Internal standard BA (100  $\mu$ M) was added after the reaction: BA;  $t_R$  = 27.2 min, 4-epi-hederagenin (M1);  $t_R$  = 22.4 min, and OA:  $t_R$  = 32.3 min.
